# Supplementary material
Source: Springer Nature journal article supplement (https://www.springermedizin.de/resource/supplementary/12894_2013_329_MOESM1_ESM.pdf/9513504)

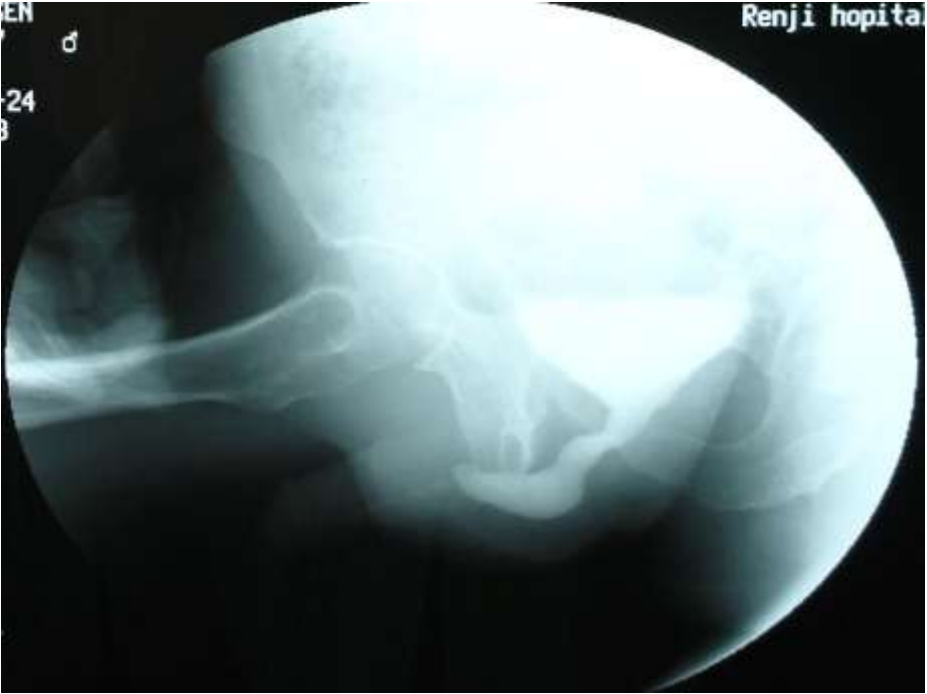

EN  
7  
-24  
B

♂

Supplement: MOESM1 [file 9513504]
